# Supplementary material for: Refining accuracy of RV–PA coupling in patients undergoing transcatheter tricuspid valve treatment
Source: Springer Nature journal article supplement (doi:10.1007/s00392-023-02339-5), 2023-11-27

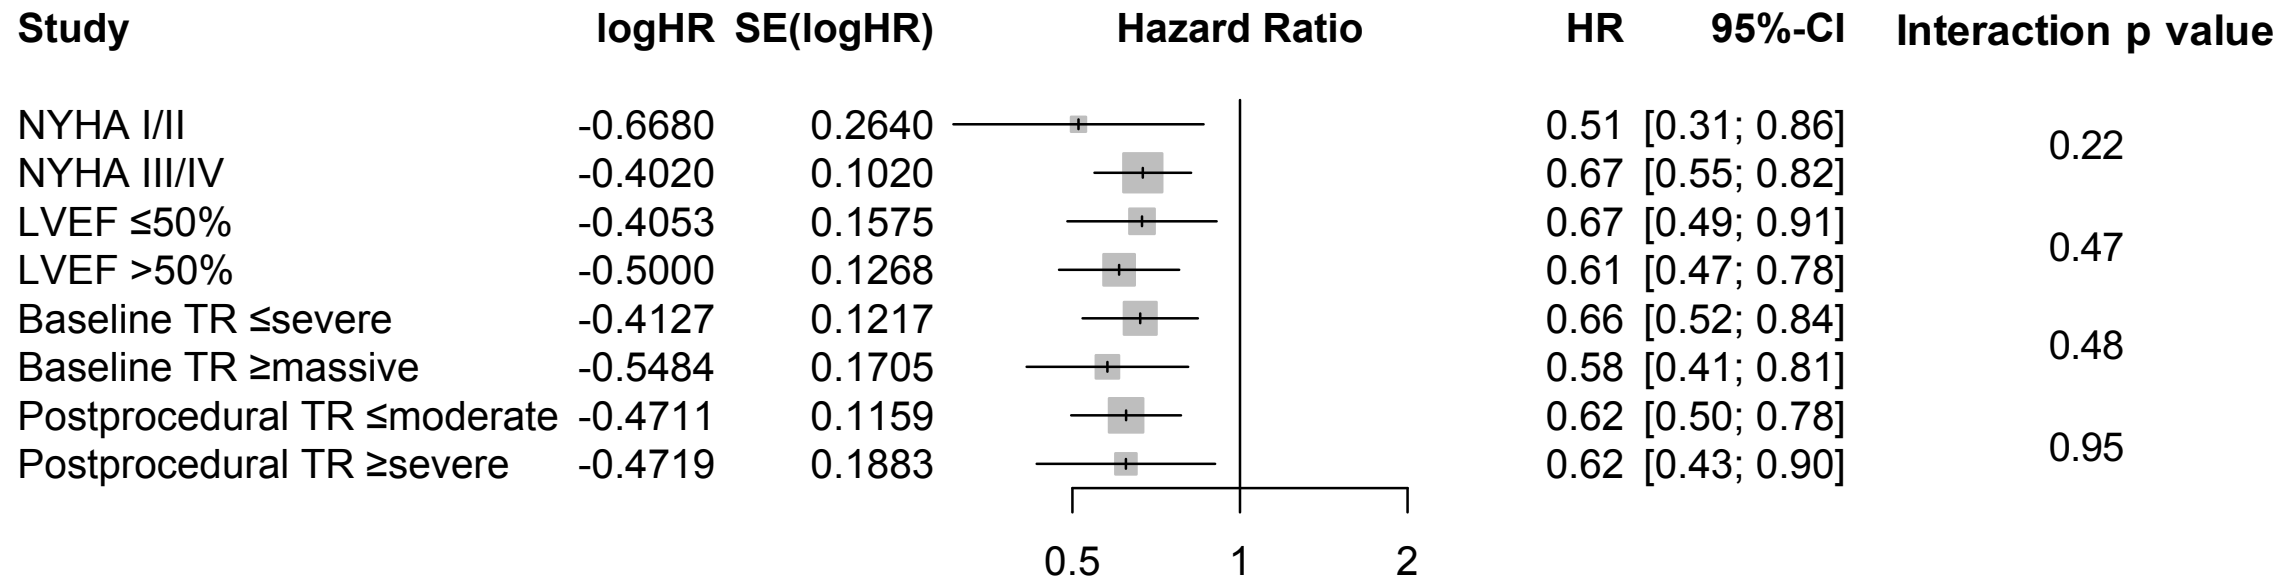

Supplement: MOESM1 [file 26362862]
